# Supplementary material for: Chitosan and its derivatives regulate lactic acid synthesis during milk fermentation
Source: PubMed Central journal article supplement (PMC11439701; doi:10.3389/fnut.2024.1441355), 2024-09-16

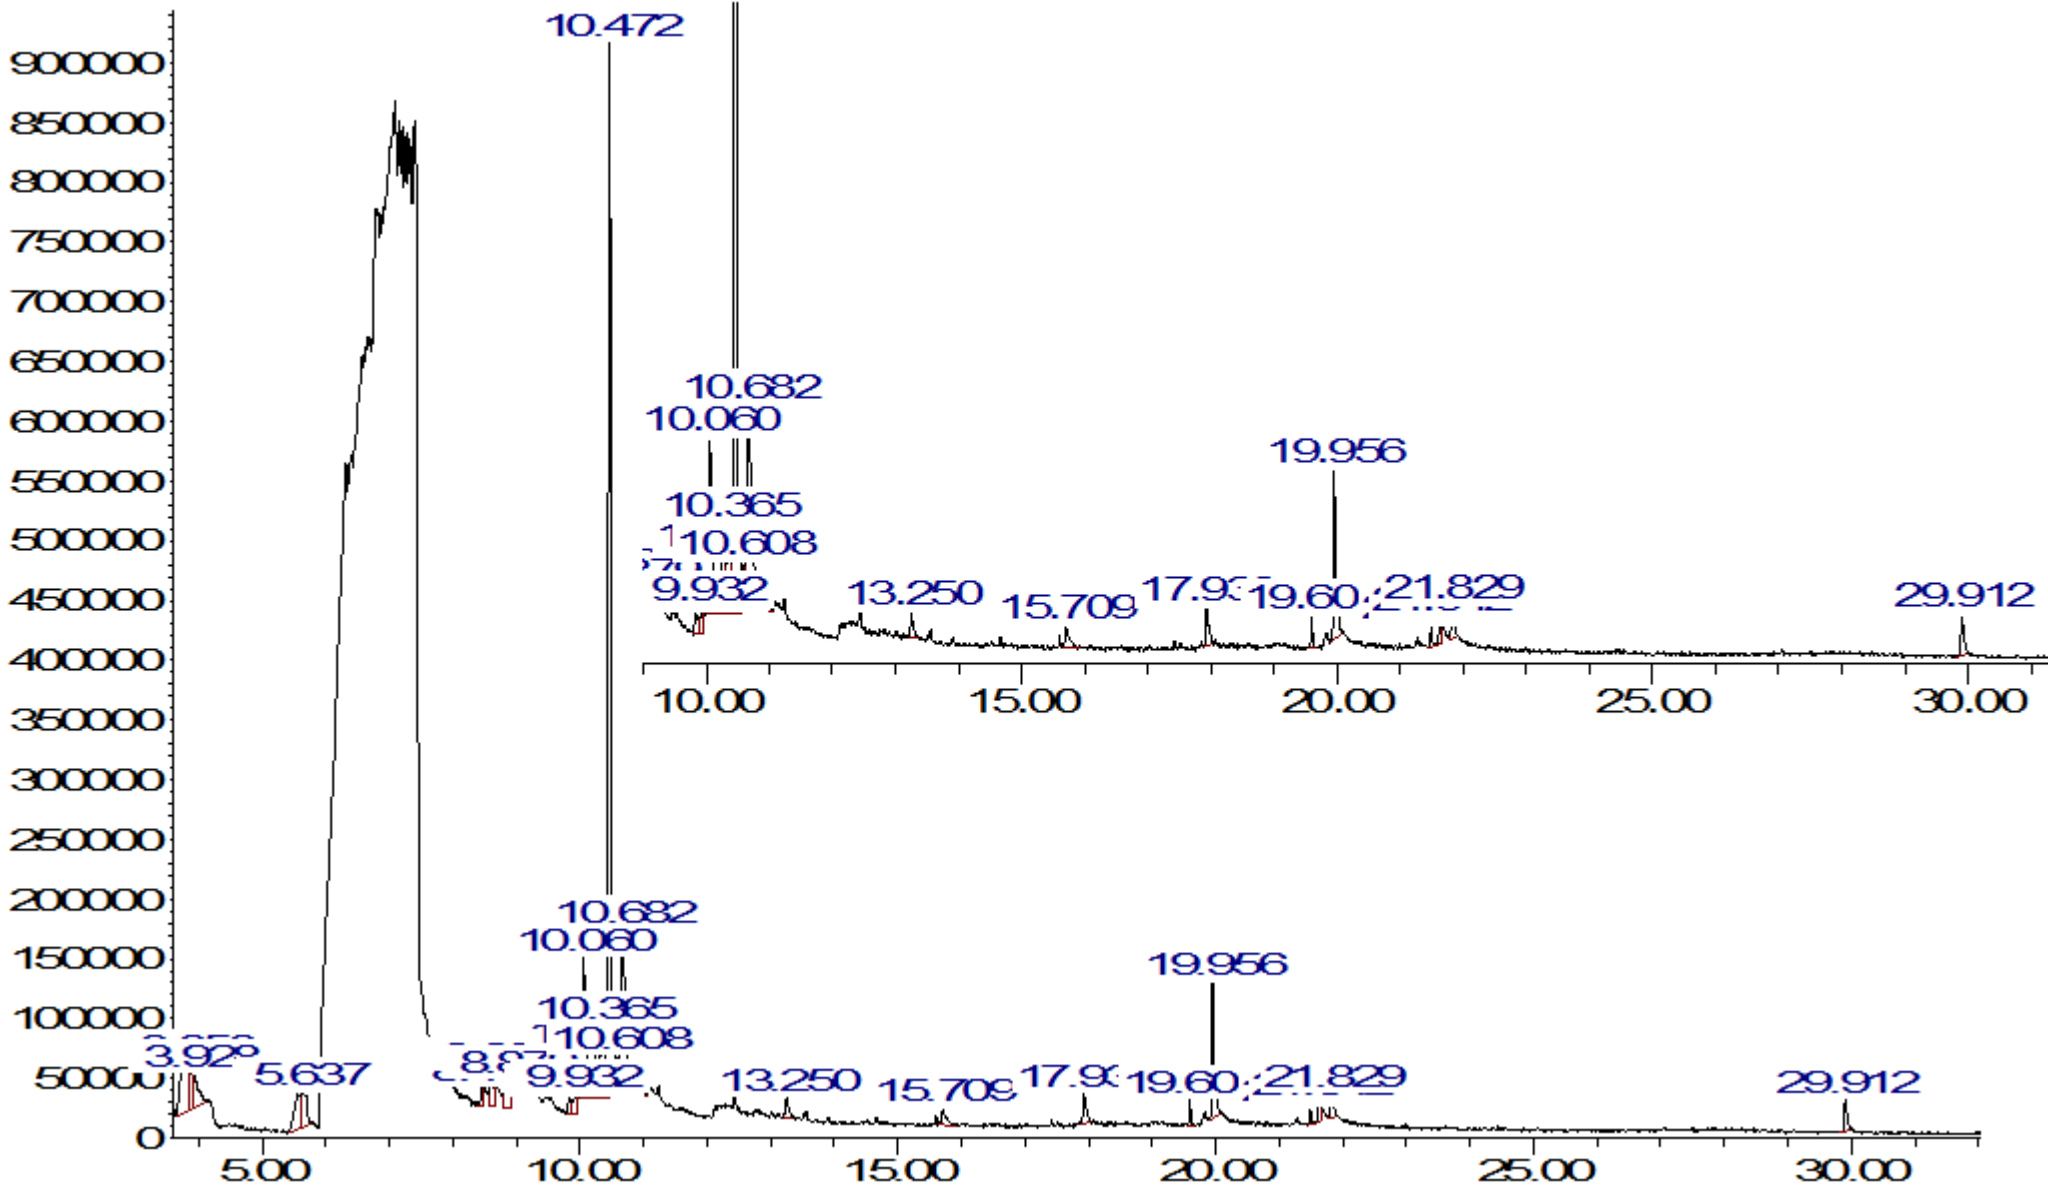

Supplement: Image_1.pdf [file Image_1.pdf]
