# Supplementary material for: Chitosan and its derivatives regulate lactic acid synthesis during milk fermentation
Source: PubMed Central journal article supplement (PMC11439701; doi:10.3389/fnut.2024.1441355), 2024-09-16
Supplement: Image_2.pdf [file Image_2.pdf]

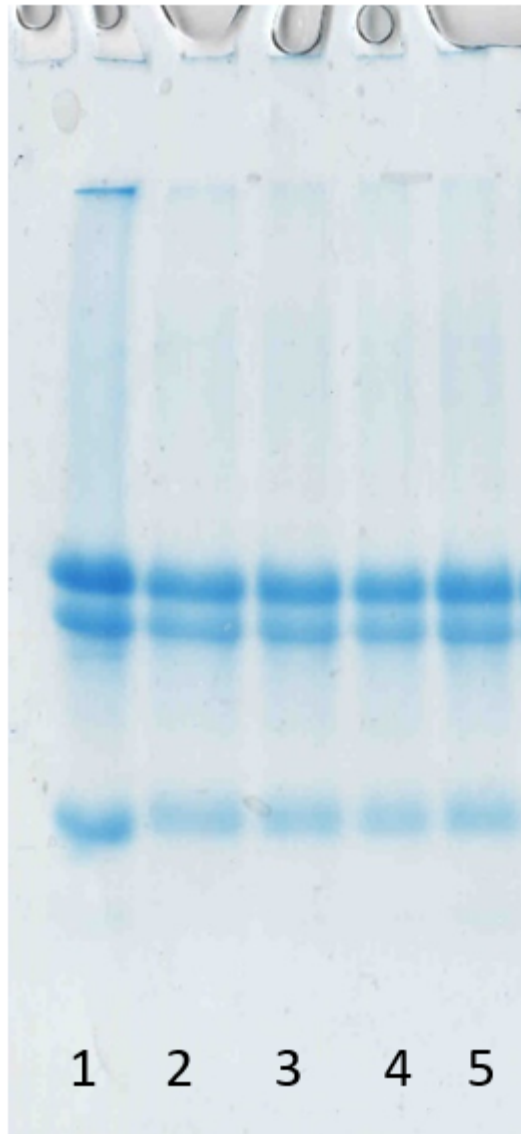

caseins

$\beta$ -lg

$\alpha$ -lg

1

2

3

4

5
